# Supplementary material for: Ni5P4-NiP2-Ni2P Nanocomposites Tangled with N-Doped Carbon for Enhanced Electrochemical Hydrogen Evolution in Acidic and Alkaline Solutions
Source: MDPI journal article supplement (doi:10.3390/catal12121650), 2022-12-15
Supplement: s1 [file s1]

# *Supporting Information*

## **Ni<sub>5</sub>P<sub>4</sub>-NiP<sub>2</sub>-Ni<sub>2</sub>P Nanocomposites Tangled with N-Doped Carbon for Enhanced Electrochemical Hydrogen Evolution in Acidic and Alkaline Solutions**

Miaomiao Pei <sup>1</sup>, Xiaowei Song <sup>1,2,\*</sup>, Haihong Zhong <sup>2,3,\*</sup>, Luis A. Estudillo-Wong <sup>4</sup>, Yingchun Gao <sup>1</sup>, Tongmengyao Jin <sup>1</sup>, Ju Huang <sup>1</sup>, Yali Wang <sup>1</sup>, Jun Yang <sup>5</sup> and Yongjun Feng <sup>2,\*</sup>

<sup>1</sup> Key Laboratory of Functional Coordination Compounds of Anhui Higher Education Institutes, School of Chemistry and Chemical Engineering, Anqing Normal University, Anqing 246011, China

<sup>2</sup> State Key Laboratory of Chemical Resource Engineering, Beijing Engineering Center for Hierarchical Catalysts, College of Chemistry, Beijing University of Chemical Technology, No. 15 Beisanhuan East Road, Beijing 100029, China

<sup>3</sup> College of Science, Hainan University, Haikou 570228, China

<sup>4</sup> Departamento de Biociencias e Ingeniería, CIEMAD-IPN, Instituto Politécnico Nacional, Calle 30 de junio de 1520, Alcaldía GAM, C.P. 07340, Ciudad de México, México

<sup>5</sup> State Key Laboratory of Multiphase Complex Systems, Institute of Process Engineering, Chinese Academy of Sciences, Beijing 100190, China.

\* Correspondence: songxw@aqnu.edu.cn (X. S.); hzhong@buct.edu.cn (H. Z.); yjfeng@mail.buct.edu.cn (Y. F.)

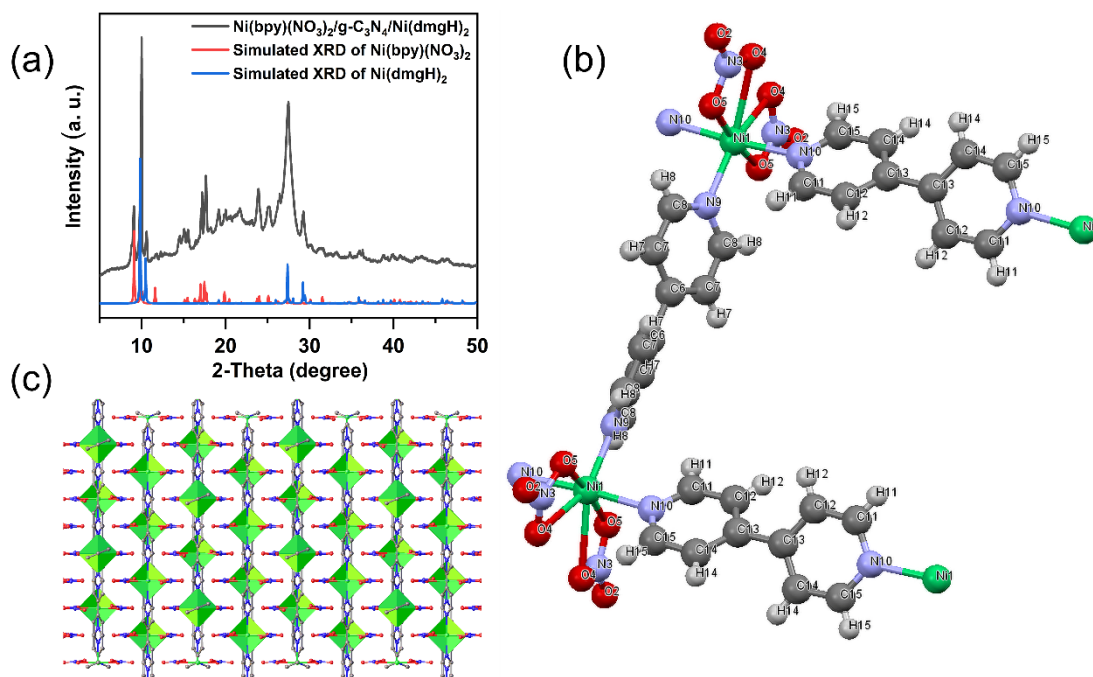

Figure S1 (a) XRD pattern of the precursor  $\text{Ni(bpy)(NO}_3)_2/\text{g-C}_3\text{N}_4/\text{Ni(dmgH)}_2$  and simulated XRD patterns of  $\text{Ni(bpy)(NO}_3)_2$  and  $\text{Ni(dmgH)}_2$ , (b) and (c) the crystal structure of  $\text{Ni(bpy)(NO}_3)_2$ . (The compound  $\text{Ni(bpy)(NO}_3)_2$  crystallizes in the orthorhombic space group  $Fddd$ ,  $a = 11.2717(3) \text{ \AA}$ ,  $b = 20.6009(8) \text{ \AA}$ ,  $c = 34.4255(11) \text{ \AA}$ ,  $\alpha = \beta = \gamma = 90^\circ$ ,  $V = 7993.8(5) \text{ \AA}^3$ ,  $R_1 / wR_2 (I > 2\sigma(I)) = 0.0498/0.1443$ ,  $R_1 / wR_2 (\text{all data}) = 0.0588/0.1542$ ,  $\text{GooF} = 1.056$ ; the simulated XRD patterns of  $\text{Ni(bpy)(NO}_3)_2$  and  $\text{Ni(dmgH)}_2$  originated from the single crystal data, while the single crystal file of  $\text{Ni(dmgH)}_2$  was obtained from the CCDC No.759570)

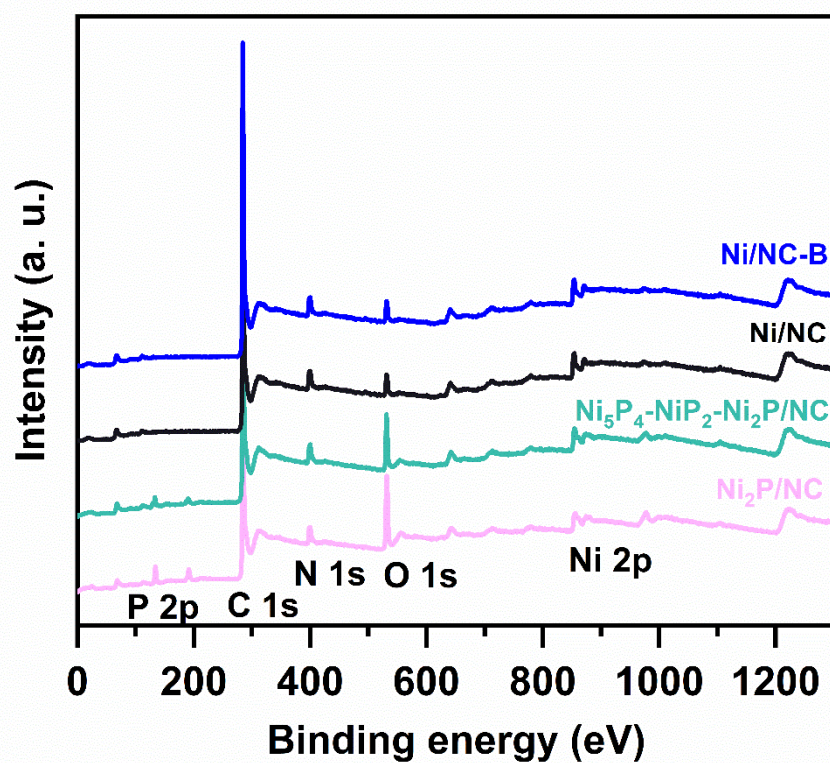

Figure S2 X-ray photoelectron spectra of Ni/NC, Ni<sub>2</sub>P/NC, Ni<sub>5</sub>P<sub>4</sub>-NiP<sub>2</sub>-Ni<sub>2</sub>P/NC and Ni/NC-B

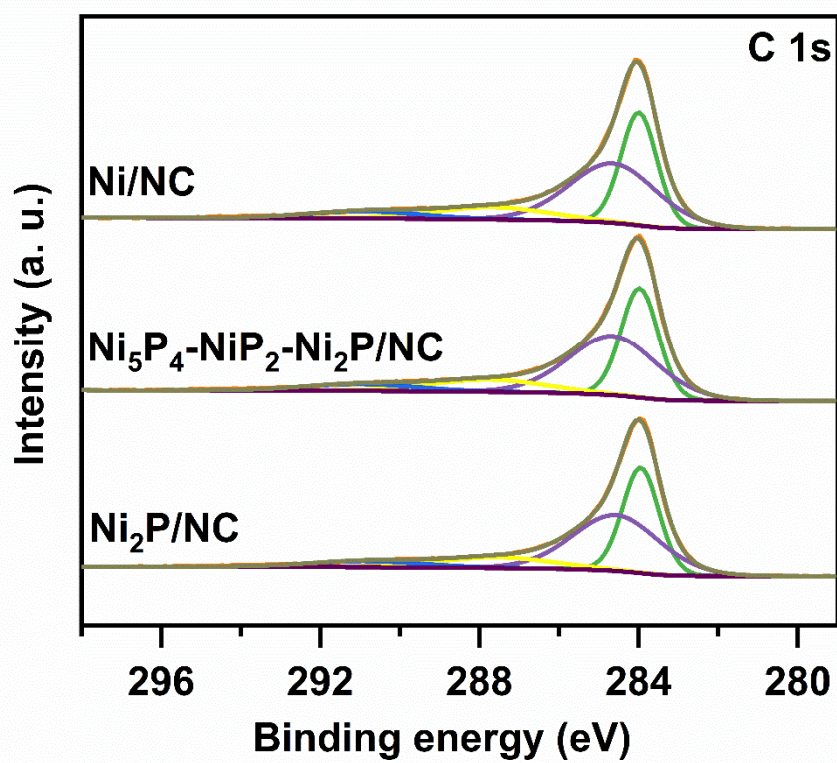

Figure S3 High-resolution XPS spectra of C 1s for the samples Ni/NC,  $\text{Ni}_2\text{P/NC}$  and  $\text{Ni}_5\text{P}_4\text{-NiP}_2\text{-Ni}_2\text{P/NC}$

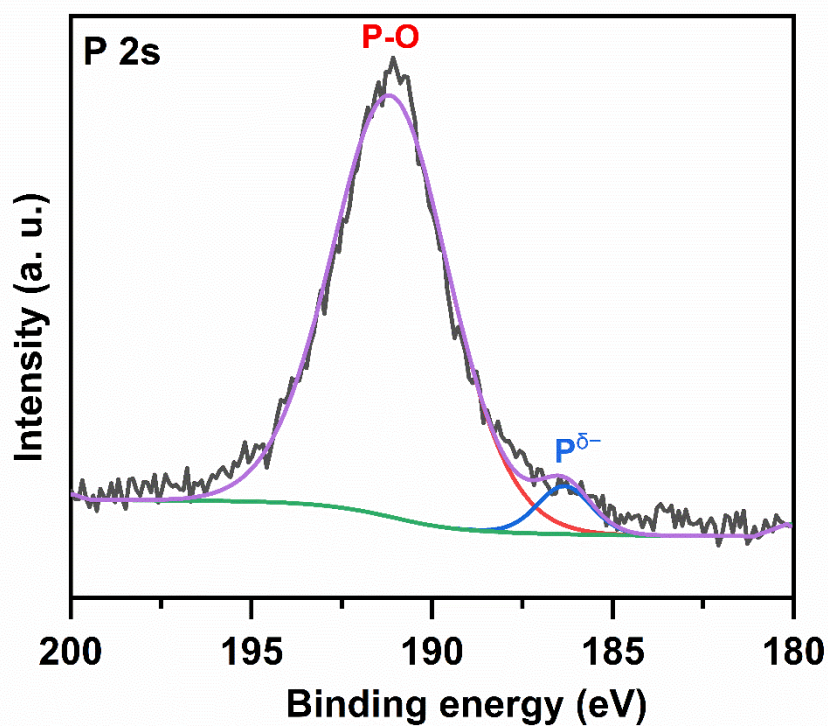

Figure S4 High-resolution XPS spectrum of P 2s for the sample Ni<sub>2</sub>P/NC

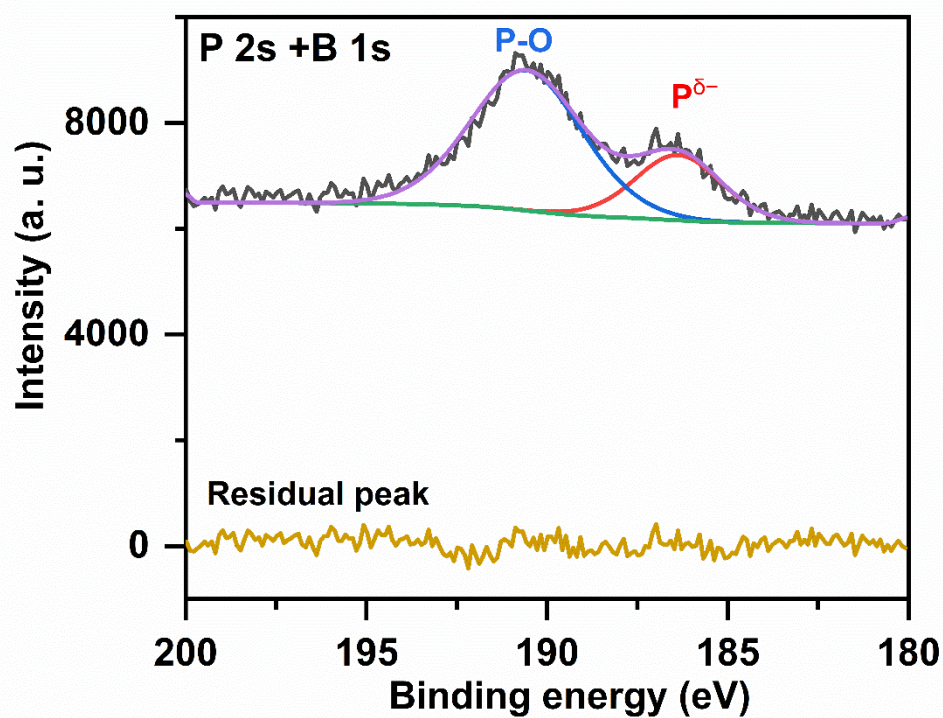

Figure S5 High-resolution XPS spectra of P 2s + B 1s for the sample Ni<sub>5</sub>P<sub>4</sub>-NiP<sub>2</sub>-Ni<sub>2</sub>P/NC

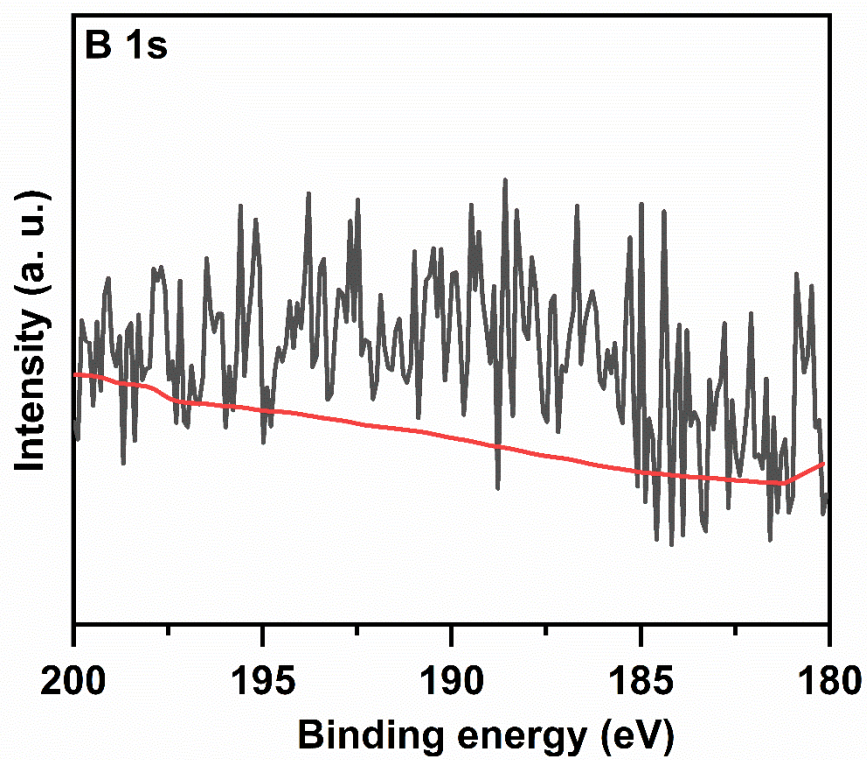

Figure S6 High-resolution XPS spectrum of B 1s for the sample Ni/NC-B

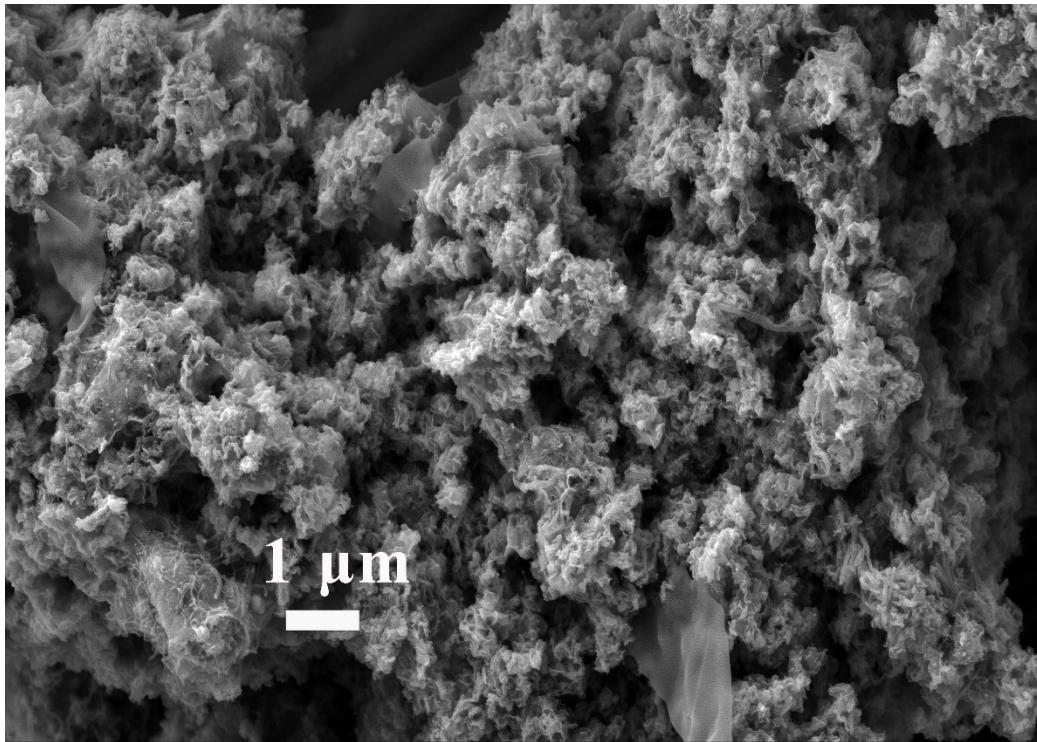

Figure S7 SEM image for  $\text{Ni}_5\text{P}_4\text{-NiP}_2\text{-Ni}_2\text{P/NC}$  after the chronopotentiometric test in 0.5 M  $\text{H}_2\text{SO}_4$  solution

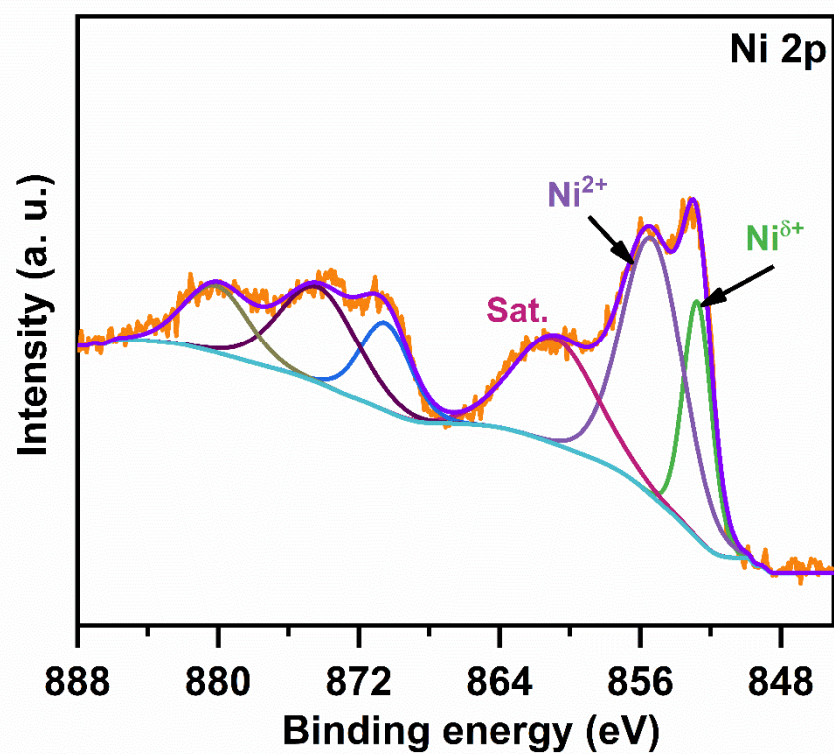

Figure S8 XPS high-resolution spectrum of Ni 2p for Ni<sub>5</sub>P<sub>4</sub>-NiP<sub>2</sub>-Ni<sub>2</sub>P/NC after the chronopotentiometric test in 0.5 M H<sub>2</sub>SO<sub>4</sub> solution

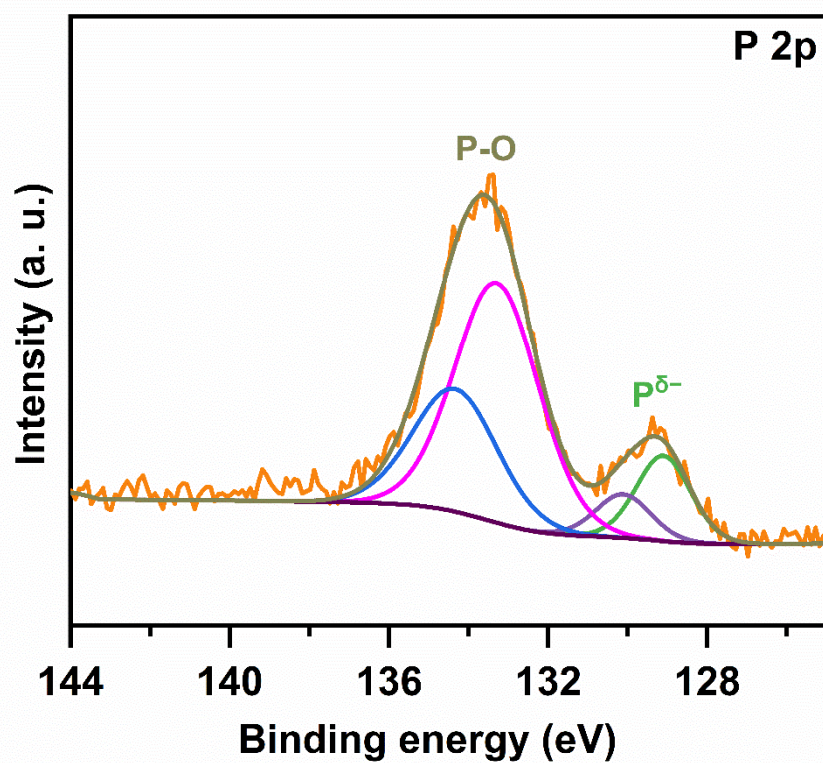

Figure S9 XPS high-resolution spectrum of P 2p for Ni<sub>5</sub>P<sub>4</sub>-NiP<sub>2</sub>-Ni<sub>2</sub>P/NC after the chronopotentiometric test in 0.5 M H<sub>2</sub>SO<sub>4</sub> solution

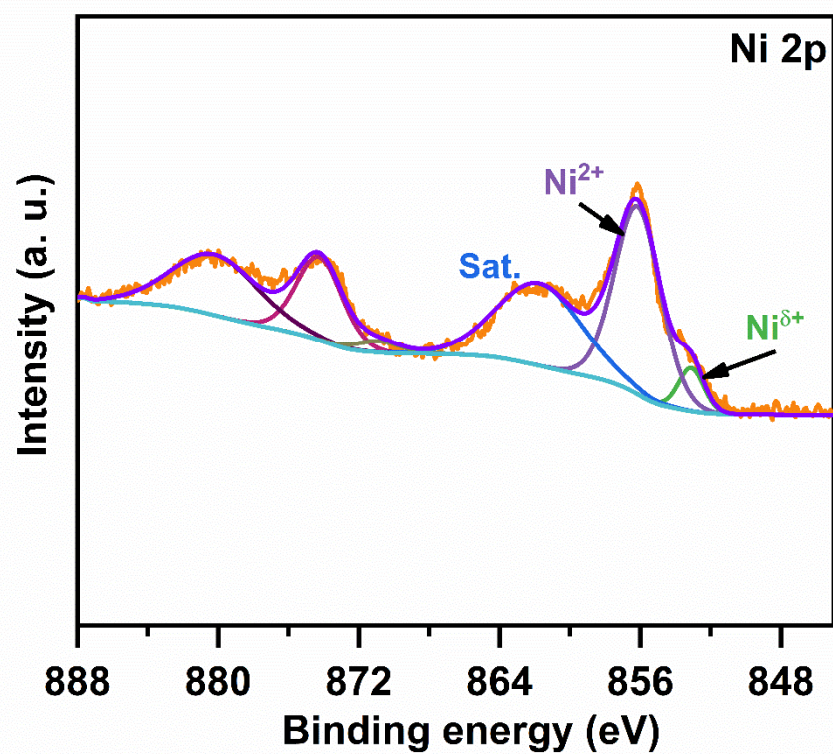

Figure S10 XPS high-resolution spectrum of Ni 2p for Ni<sub>5</sub>P<sub>4</sub>-NiP<sub>2</sub>-Ni<sub>2</sub>P/NC after the chronopotentiometric test in 1 M KOH solution

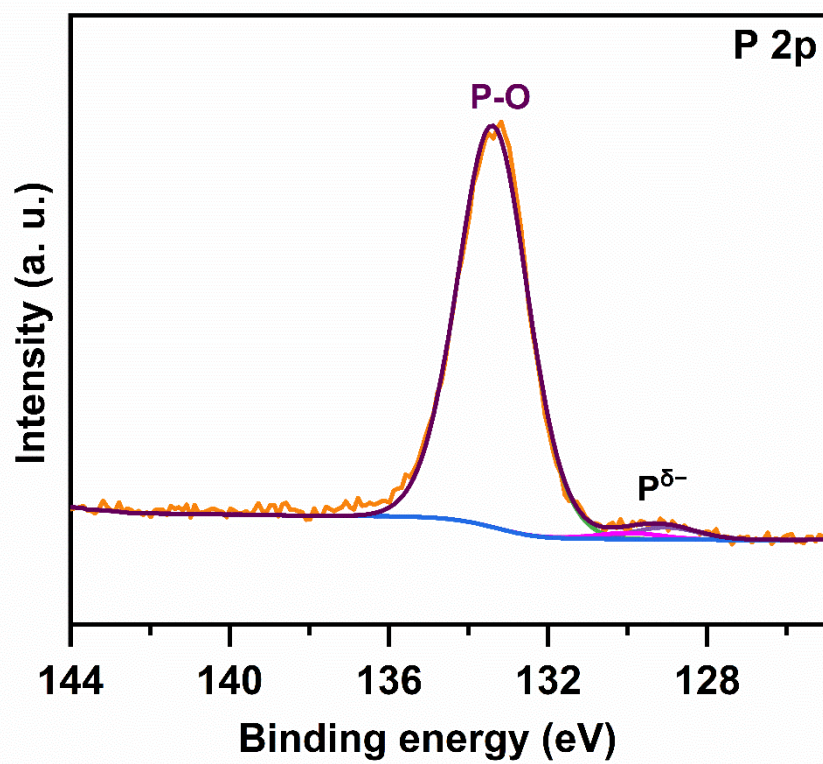

Figure S11 XPS high-resolution spectrum of P 2p for Ni<sub>5</sub>P<sub>4</sub>-NiP<sub>2</sub>-Ni<sub>2</sub>P/NC after the chronopotentiometric test in 1 M KOH solution

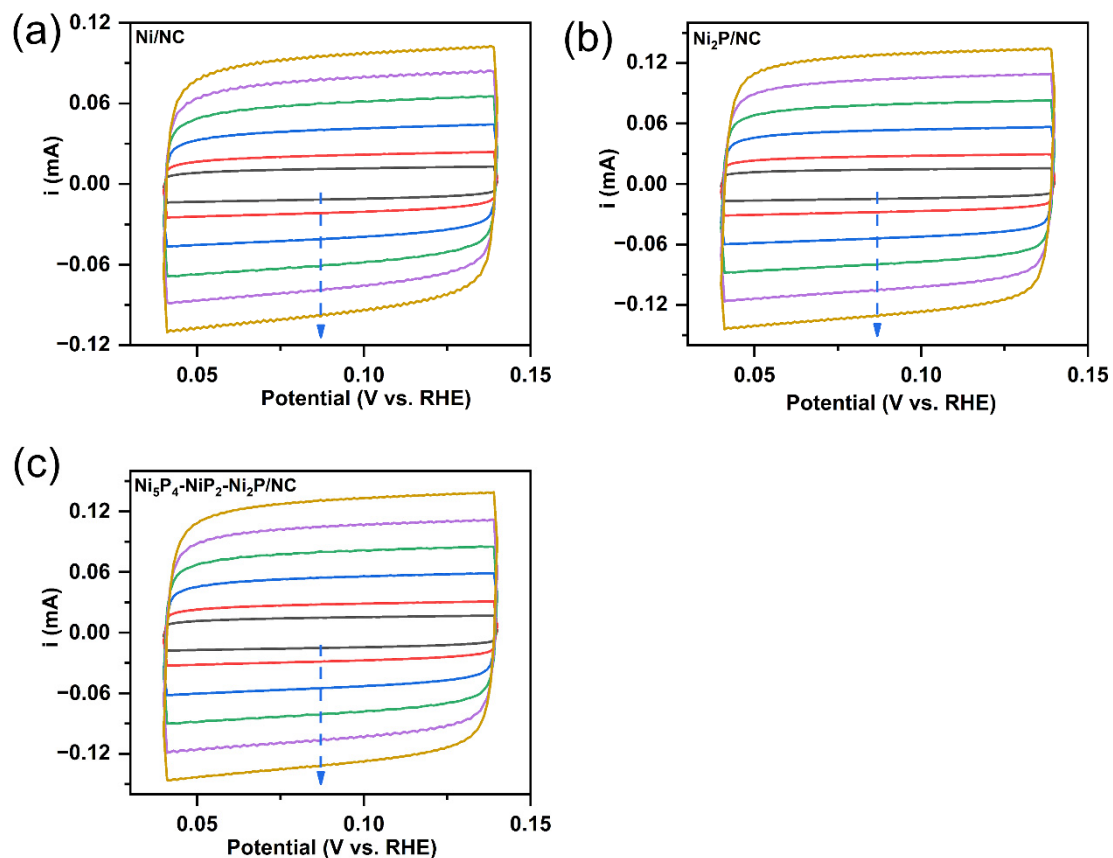

Figure S12 Electrochemical double-layer capacitance ( $C_{dl}$ ) measurements in 0.5 M  $H_2SO_4$  for (a) Ni/NC, (b)  $Ni_2P/NC$ , and (c)  $Ni_5P_4-NiP_2-Ni_2P/NC$  using CV scans at different scan rates from 10 to 100  $mV \cdot s^{-1}$

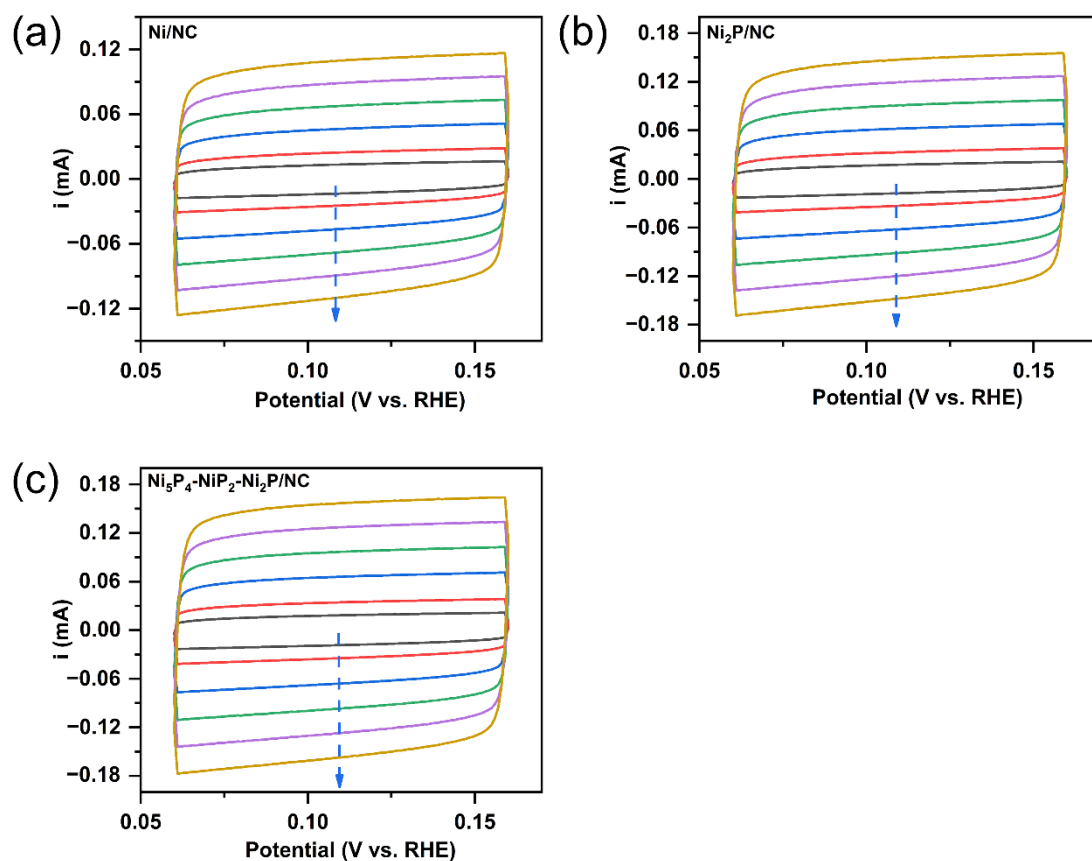

Figure S13 Electrochemical double-layer capacitance ( $C_{dl}$ ) measurements in 1 M KOH for (a) Ni/NC, (b)  $Ni_2P/NC$ , and (c)  $Ni_5P_4-NiP_2-Ni_2P/NC$  using CV scans at different scan rates from 10 to 100  $mV \cdot s^{-1}$

**Table S1** Microstructural properties obtained by RRM for the sample Ni<sub>5</sub>P<sub>4</sub>-NiP<sub>2</sub>-Ni<sub>2</sub>P/NC

| Phases                                              | Mass percentage | Lattice parameter                   | Crystallite size |
|-----------------------------------------------------|-----------------|-------------------------------------|------------------|
|                                                     | wt. %           | Å                                   | nm               |
| Ni <sub>5</sub> P <sub>4</sub> (P6 <sub>3</sub> mc) | 35.84 (0.48)    | $a = b = 6.7909 (5 \times 10^{-4})$ | 90.4 (3.4)       |
|                                                     |                 | $c = 10.9954 (1 \times 10^{-3})$    |                  |
| NiP <sub>2</sub> (Pa $\bar{3}$ )                    | 49.26 (0.66)    | $a = 5.4547 (3 \times 10^{-4})$     | 70.6 (1.3)       |
| Ni <sub>2</sub> P (P $\bar{6}$ 2m)                  | 14.90 (0.42)    | $a = b = 5.8744 (2 \times 10^{-3})$ | 30.3 (1.3)       |
|                                                     |                 | $c = 3.3858 (2 \times 10^{-3})$     |                  |

Table S2 Surface atomic compositions obtained from XPS spectra for the as-prepared samples

| samples                                                                | C 1s (at %) | O 1s (at %) | N 1s (at %) | P 2p (at %) | Ni 2p (at %) |
|------------------------------------------------------------------------|-------------|-------------|-------------|-------------|--------------|
| Ni <sub>2</sub> P/NC                                                   | 80.57       | 11.01       | 5.25        | 1.85        | 1.32         |
| Ni <sub>5</sub> P <sub>4</sub> -NiP <sub>2</sub> -Ni <sub>2</sub> P/NC | 83.16       | 6.99        | 5.77        | 2.62        | 1.46         |
| Ni/NC                                                                  | 89.21       | 3.56        | 6.00        | 0           | 1.24         |

Table S3 Comparison of the HER performance of the heterostructured catalysts comprising different nickel phosphides in the literatures and this work

| Catalysts                                                                  | Substrate <sup>a</sup> | 0.5 M H <sub>2</sub> SO <sub>4</sub> |                                        |                                   | 1 M KOH          |                                        |                                   | Refs      |
|----------------------------------------------------------------------------|------------------------|--------------------------------------|----------------------------------------|-----------------------------------|------------------|----------------------------------------|-----------------------------------|-----------|
|                                                                            |                        | $\eta_{10}$ (mV)                     | Tafel slope<br>(mV dec <sup>-1</sup> ) | Loading<br>(mg cm <sup>-2</sup> ) | $\eta_{10}$ (mV) | Tafel slope<br>(mV dec <sup>-1</sup> ) | Loading<br>(mg cm <sup>-2</sup> ) |           |
| Ni <sub>5</sub> P <sub>4</sub> -NiP <sub>2</sub> -Ni <sub>2</sub> P/<br>NC | GCE                    | 168                                  | 69                                     | 0.204                             | 202              | 74                                     | 0.204                             | This work |
| Ni <sub>2</sub> P/Ni <sub>5</sub> P <sub>4</sub> @NC-<br>30                | GCE                    | 104                                  | 38.5                                   | 0.35                              | 113              | 89.5                                   | 0.35                              | [1]       |
| Ni <sub>2</sub> P@PCG                                                      | GCE                    | 110                                  | 58.6                                   | 0.51                              | 150              | 79.4                                   | 0.51                              | [2]       |
| Ni <sub>2</sub> P/CNS                                                      | GCE                    | 174                                  | 64                                     | 0.429                             | 315              | 120                                    | 0.429                             | [3]       |
| Ni <sub>2</sub> P@C-400                                                    | GCE                    | 186                                  | 64                                     | 0.566                             | 342              | N/A                                    | 0.566                             | [4]       |
| Ni <sub>2</sub> P/CNT                                                      | GCE                    | 124                                  | 53                                     | 0.184                             | N/A              | N/A                                    | N/A                               | [5]       |
| Ni <sub>2</sub> P/Ni <sub>5</sub> P <sub>4</sub> @3DN<br>G                 | GCE                    | 139                                  | 59                                     | N/A                               | N/A              | N/A                                    | N/A                               | [6]       |
| Ni <sub>2</sub> P-MOF                                                      | GCE                    | 172                                  | 62                                     | 0.35                              | N/A              | N/A                                    | N/A                               | [7]       |
| Ni <sub>2</sub> P/C                                                        | GCE                    | 198                                  | 113.2                                  | N/A                               | N/A              | N/A                                    | N/A                               | [8]       |

|                                                               |       |       |       |       |      |       |     |      |
|---------------------------------------------------------------|-------|-------|-------|-------|------|-------|-----|------|
| Ni-Ni <sub>12</sub> P <sub>5</sub> @CNTs/<br>rGO-0.5          | GCE   | 217.4 | 69.33 | 0.102 | N/A  | N/A   | N/A | [9]  |
| Ni <sub>12</sub> P <sub>5</sub> -Ni <sub>2</sub> P/Ni/N<br>F  | Ni/NF | 83    | 68    | N/A   | 129  | 70    | N/A | [10] |
| Ni <sub>5</sub> P <sub>4</sub> -Ni <sub>2</sub> P-NS          | NF    | 120   | 79.1  | N/A   | N/A  | N/A   | N/A | [11] |
| Ni <sub>2</sub> P-NRs/Ni                                      | NF    | 131   | 106.1 | N/A   | N/A  | N/A   | N/A | [12] |
| Ni <sub>5</sub> P <sub>4</sub> -NiP <sub>2</sub><br>nanosheet | NF    | 174   | 83.9  | N/A   | N/A  | N/A   | N/A | [13] |
| Ni <sub>2</sub> P–NiP <sub>2</sub> hollow<br>nanoparticle     | NF    | N/A   | N/A   | N/A   | 59.7 | 58.8  | 5   | [14] |
| Ni <sub>2</sub> P–Ni <sub>12</sub> P <sub>5</sub> /NF         | NF    | N/A   | N/A   | N/A   | 76   | 68    | N/A | [15] |
| Ni <sub>2</sub> P@NC/NF                                       | NF    | N/A   | N/A   | N/A   | 93   | 77.83 | N/A | [16] |
| Ni <sub>2</sub> P/CC                                          | CC    | 119   | 50    | N/A   | 148  | N/A   | N/A | [17] |
| NiP <sub>2</sub> -650(c/m)                                    | CC    | 160   | 60.2  | N/A   | 134  | 67    | N/A | [18] |

|                                                         |    |     |      |      |     |     |     |      |
|---------------------------------------------------------|----|-----|------|------|-----|-----|-----|------|
| CC@Ni-P                                                 | CC | 93  | 58.2 | N/A  | N/A | N/A | N/A | [19] |
| Ni <sub>12</sub> P <sub>5</sub> -Ni <sub>2</sub> P      | CC | 166 | 60   | 0.25 | N/A | N/A | N/A | [20] |
| Ni <sub>2</sub> P-Ni <sub>5</sub> P <sub>4</sub> arrays | CC | N/A | N/A  | N/A  | 102 | 83  | N/A | [21] |

---

<sup>a</sup> GCE: glassy carbon electrode, NF: nickel foam, CC: carbon cloth; N/A: Not available

Table S4 Electrochemical active surface area (ECSA) of the as-prepared composites

| Catalysts                                                              | Electrolytes                         | C <sub>dl</sub> (μF) | ECSA (cm <sup>2</sup> ) |
|------------------------------------------------------------------------|--------------------------------------|----------------------|-------------------------|
| Ni <sub>2</sub> P/NC                                                   | 0.5 M H <sub>2</sub> SO <sub>4</sub> | 1300                 | 32.5                    |
|                                                                        | 1 M KOH                              | 1500                 | 37.5                    |
| Ni <sub>5</sub> P <sub>4</sub> -NiP <sub>2</sub> -Ni <sub>2</sub> P/NC | 0.5 M H <sub>2</sub> SO <sub>4</sub> | 1320                 | 33                      |
|                                                                        | 1 M KOH                              | 1590                 | 39.8                    |
| Ni/NC                                                                  | 0.5 M H <sub>2</sub> SO <sub>4</sub> | 980                  | 24.5                    |
|                                                                        | 1 M KOH                              | 1110                 | 27.8                    |

## References

1. Hong, W.; Lv, C.; Sun, S.; Chen, G. Fabrication and Study of the Synergistic Effect of Janus Ni<sub>2</sub>P/Ni<sub>5</sub>P<sub>4</sub> Embedded in N-Doped Carbon as Efficient Electrocatalysts for Hydrogen Evolution Reaction. *Catal. Sci. Technol.* **2020**, *10*, 1023-1029.
2. Miao, M.; Hou, R.; Liang, Z.; Qi, R.; He, T.; Yan, Y.; Qi, K.; Liu, H.; Feng, G.; Xia, B.Y. Chainmail Catalyst of Ultrathin P-Doped Carbon Shell-Encapsulated Nickel Phosphides on Graphene towards Robust and Efficient Hydrogen Generation. *J. Mater. Chem. A* **2018**, *6*, 24107-24113.
3. Li, Y.; Cai, P.; Ci, S.; Wen, Z. Strongly Coupled 3D Nanohybrids with Ni<sub>2</sub>P/Carbon Nanosheets as pH-Universal Hydrogen Evolution Reaction Electrocatalysts. *ChemElectroChem* **2017**, *4*, 340-344.
4. He, S.; He, S.; Gao, F.; Bo, X.; Wang, Q.; Chen, X.; Duan, J.; Zhao, C. Ni<sub>2</sub>P@carbon Core-Shell Nanorod Array Derived from ZIF-67-Ni: Effect of Phosphorization Temperature on Morphology, Structure and Hydrogen Evolution Reaction Performance. *Appl. Surf. Sci.* **2018**, *457*, 933-941.
5. Pan, Y.; Hu, W.; Liu, D.; Liu, Y.; Liu, C. Carbon Nanotubes Decorated with Nickel Phosphide Nanoparticles as Efficient Nanohybrid Electrocatalysts for the Hydrogen Evolution Reaction. *J. Mater. Chem. A* **2015**, *3*, 13087-13094.
6. Ding, G.; Zhang, Y.; Dong, J.; Xu, L. Fabrication of Ni<sub>2</sub>P/Ni<sub>5</sub>P<sub>4</sub> Nanoparticles Embedded in Three-Dimensional N-Doped Graphene for Acidic Hydrogen Evolution Reaction. *Mater. Lett.* **2021**, *299*, 130071.
7. Tian, T.; Ai, L.; Jiang, J. Metal–Organic Framework-Derived Nickel Phosphides as Efficient Electrocatalysts toward Sustainable Hydrogen Generation from Water Splitting. *RSC Adv.* **2015**, *5*, 10290-10295.
8. He, S.; He, S.; Bo, X.; Wang, Q.; Zhan, F.; Wang, Q.; Zhao, C. Porous Ni<sub>2</sub>P/C Microrods Derived from Microwave-Prepared MOF-74-Ni and Its Electrocatalysis for Hydrogen Evolution Reaction. *Mater. Lett.* **2018**, *231*, 94-97.
9. Chen, L.; Wu, P.; Yang, S.; Qian, K.; Sun, W.; Wei, W.; Xu, Y.; Xie, J. Fabrication of CNTs Encapsulated Nickel-Nickel Phosphide Nanoparticles on Graphene for Remarkable Hydrogen Evolution Reaction Performance. *J. Electroanal. Chem.* **2019**, *846*, 113142.
10. Zhang, J.; Zhang, Z.; Ji, Y.; Yang, J.; Fan, K.; Ma, X.; Wang, C.; Shu, R.; Chen, Y. Surface Engineering Induced Hierarchical Porous Ni<sub>12</sub>P<sub>5</sub>-Ni<sub>2</sub>P Polymorphs Catalyst for Efficient Wide pH Hydrogen Production. *Appl. Catal. B: Environ.* **2021**, *282*, 119609.
11. Wang, X.; Kolen'ko, Y.V.; Bao, X.-Q.; Kovnir, K.; Liu, L. One-Step Synthesis of Self-Supported Nickel Phosphide Nanosheet Array Cathodes for Efficient Electrocatalytic Hydrogen Generation. *Angew. Chem. Int. Ed.* **2015**, *54*, 8188-8192.
12. Wang, X.; Kolen'ko, Y.V.; Liu, L. Direct Solvothermal Phosphorization of Nickel Foam to Fabricate Integrated Ni<sub>2</sub>P-Nanorods/Ni Electrodes for Efficient Electrocatalytic Hydrogen Evolution. *Chem. Commun.* **2015**, *51*, 6738-6741.
13. Cai, W.; Liu, W.; Sun, H.; Li, J.; Yang, L.; Liu, M.; Zhao, S.; Wang, A. Ni<sub>5</sub>P<sub>4</sub>-NiP<sub>2</sub> Nanosheet Matrix Enhances Electron-Transfer Kinetics for Hydrogen Recovery in Microbial Electrolysis Cells. *Appl. Energy* **2018**, *209*, 56-64.

14. Liu, T.; Li, A.; Wang, C.; Zhou, W.; Liu, S.; Guo, L. Interfacial Electron Transfer of Ni<sub>2</sub>P–NiP<sub>2</sub> Polymorphs Inducing Enhanced Electrochemical Properties. *Adv. Mater.* **2018**, *30*, 1803590.
15. Wang, Z.; Wang, S.; Ma, L.; Guo, Y.; Sun, J.; Zhang, N.; Jiang, R. Water-Induced Formation of Ni<sub>2</sub>P–Ni<sub>12</sub>P<sub>5</sub> Interfaces with Superior Electrocatalytic Activity toward Hydrogen Evolution Reaction. *Small* **2021**, *17*, 2006770.
16. Zhang, H.; Li, W.; Feng, X.; Zhu, L.; Fang, Q.; Li, S.; Wang, L.; Li, Z.; Kou, Z. A Chainmail Effect of Ultrathin N-Doped Carbon Shell on Ni<sub>2</sub>P Nanorod Arrays for Efficient Hydrogen Evolution Reaction Catalysis. *J. Colloid Interf. Sci.* **2022**, *607*, 281-289.
17. Huo, S.; Yang, S.; Niu, Q.; Yang, F.; Song, L. Synthesis of Functional Ni<sub>2</sub>P/CC Catalyst and the Robust Performances in Hydrogen Evolution Reaction and Nitrate Reduction. *Int. J. Hydrogen Energ.* **2020**, *45*, 4015-4025.
18. Fu, Q.; Wang, X.; Han, J.; Zhong, J.; Zhang, T.; Yao, T.; Xu, C.; Gao, T.; Xi, S.; Liang, C.; Xu, L.; Xu, P.; Song, B. Phase-Junction Electrocatalysts towards Enhanced Hydrogen Evolution Reaction in Alkaline Media. *Angew. Chem. Int. Ed.* **2021**, *60*, 259-267.
19. Chen, A.; Fu, L.; Xiang, W.; Wei, W.; Liu, D.; Liu, C. Facile Synthesis of Ni<sub>5</sub>P<sub>4</sub> Nanosheets/Nanoparticles for Highly Active and Durable Hydrogen Evolution. *Int. J. Hydrogen Energ.* **2021**, *46*, 11701-11710.
20. Shi, H.; Yu, Q.; Liu, G.; Hu, X. Promoted Electrocatalytic Hydrogen Evolution Performance by Constructing Ni<sub>12</sub>P<sub>5</sub>–Ni<sub>2</sub>P Heterointerfaces. *Int. J. Hydrogen Energ.* **2021**, *46*, 17097-17105.
21. Yan, Y.; Lin, J.; Bao, K.; Xu, T.; Qi, J.; Cao, J.; Zhong, Z.; Fei, W.; Feng, J. Free-Standing Porous Ni<sub>2</sub>P–Ni<sub>5</sub>P<sub>4</sub> Heterostructured Arrays for Efficient Electrocatalytic Water Splitting. *J. Colloid Interf. Sci.* **2019**, *552*, 332-336.
